# Supplementary material for: L-arginine and N-carbamoylglutamic acid supplementation enhance young rabbit growth and immunity by regulating intestinal microbial community
Source: PubMed Central journal article supplement (PMC6946986; doi:10.5713/ajas.18.0984), 2019-05-28
Supplement: ajas-18-0984-suppl1.pdf [file ajas-18-0984-suppl1.pdf]

**Supplementary Table S1.** Sequencing data quality assessment

| <b>Sample ID</b> | <b>PE Reads</b> | <b>Raw Tags</b> | <b>Clean Tags</b> | <b>Effective Tags</b> | <b>AvgLen (bp)</b> | <b>GC (%)</b> | <b>Q20 (%)</b> | <b>Q30 (%)</b> | <b>Effective (%)</b> |
|------------------|-----------------|-----------------|-------------------|-----------------------|--------------------|---------------|----------------|----------------|----------------------|
| S1C1             | 79,612          | 65,994          | 55,764            | 55,754                | 412                | 52.95         | 94.31          | 88.15          | 70.03                |
| S1C2             | 79,764          | 66,872          | 56,704            | 56,587                | 413                | 53.44         | 94.28          | 88.10          | 70.94                |
| S1C3             | 79,794          | 69,039          | 60,461            | 60,415                | 412                | 52.67         | 94.79          | 89.17          | 75.71                |
| S1L1             | 79,936          | 66,618          | 55,891            | 55,785                | 414                | 54.02         | 94.42          | 88.28          | 69.79                |
| S1L2             | 79,930          | 67,031          | 57,483            | 57,300                | 411                | 53.60         | 94.38          | 88.24          | 71.69                |
| S1L3             | 80,078          | 67,146          | 57,512            | 57,214                | 411                | 53.84         | 94.35          | 88.19          | 71.45                |
| S1N1             | 80,043          | 67,007          | 57,646            | 57,511                | 413                | 52.98         | 94.66          | 88.90          | 71.85                |
| S1N2             | 79,921          | 66,687          | 56,772            | 56,642                | 413                | 53.53         | 94.62          | 88.71          | 70.87                |
| S1N3             | 80,338          | 66,982          | 57,334            | 57,203                | 414                | 53.79         | 94.73          | 88.99          | 71.2                 |
| S2C1             | 79,932          | 68,990          | 60,181            | 59,953                | 412                | 53.54         | 94.99          | 89.52          | 75.01                |
| S2C2             | 80,448          | 67,474          | 58,186            | 58,091                | 411                | 53.08         | 94.42          | 88.36          | 72.21                |
| S2C3             | 80,024          | 68,193          | 59,081            | 59,071                | 413                | 52.65         | 94.68          | 88.94          | 73.82                |
| S2L1             | 79,759          | 67,933          | 59,656            | 59,599                | 409                | 52.63         | 94.74          | 89.05          | 74.72                |
| S2L2             | 80,307          | 69,047          | 60,148            | 60,078                | 413                | 52.55         | 94.69          | 88.97          | 74.81                |
| S2L3             | 80,134          | 66,939          | 57,065            | 56,977                | 413                | 53.81         | 94.51          | 88.50          | 71.1                 |
| S2N1             | 79,985          | 67,142          | 57,358            | 57,288                | 413                | 53.39         | 94.58          | 88.70          | 71.62                |
| S2N2             | 80,006          | 67,727          | 58,602            | 58,554                | 413                | 52.71         | 94.57          | 88.74          | 73.19                |
| S2N3             | 80,203          | 66,981          | 57,617            | 57,410                | 411                | 53.31         | 94.42          | 88.33          | 71.58                |
