# Supplementary material for: L-arginine and N-carbamoylglutamic acid supplementation enhance young rabbit growth and immunity by regulating intestinal microbial community
Source: PubMed Central journal article supplement (PMC6946986; doi:10.5713/ajas.18.0984), 2019-05-28
Supplement: ajas-18-0984-suppl2.pdf [file ajas-18-0984-suppl2.pdf]

**Supplementary Table S2** Alpha diversity (Chao1、Ace、Shannon、Simpson) of sequenced samples

| Sample ID | OTU | ACE        | Chao1      | Simpson | Shannon | Coverage |
|-----------|-----|------------|------------|---------|---------|----------|
| S1C1      | 896 | 949.741    | 963.8333   | 0.0238  | 4.9934  | 0.9964   |
| S1C2      | 884 | 963.9462   | 967.1786   | 0.0232  | 4.8701  | 0.9956   |
| S1C3      | 921 | 956.3959   | 955.5149   | 0.0231  | 5.0183  | 0.9976   |
| S1L1      | 890 | 932.3406   | 937.5      | 0.0313  | 4.7803  | 0.9969   |
| S1L2      | 964 | 1,008.6937 | 1,018.7979 | 0.0171  | 5.1741  | 0.9967   |
| S1L3      | 868 | 922.9498   | 935.6552   | 0.0172  | 5.0837  | 0.9963   |
| S1N1      | 943 | 996.4895   | 1,012.2581 | 0.0158  | 5.0858  | 0.9965   |
| S1N2      | 869 | 977.0273   | 987.1651   | 0.0448  | 4.4667  | 0.995    |
| S1N3      | 912 | 993.7765   | 1,002.5505 | 0.0253  | 4.8933  | 0.9957   |
| S2C1      | 949 | 1,016.6593 | 1,024.0545 | 0.0228  | 4.94    | 0.9963   |
| S2C2      | 922 | 970.9911   | 971.6364   | 0.0233  | 4.9925  | 0.9967   |
| S2C3      | 920 | 969.5204   | 983.7766   | 0.0184  | 4.9961  | 0.9968   |
| S2L1      | 921 | 977.8398   | 993.033    | 0.03    | 4.8099  | 0.9967   |
| S2L2      | 917 | 975.5155   | 983.8667   | 0.0231  | 4.9449  | 0.9965   |
| S2L3      | 864 | 914.0433   | 920.4839   | 0.0177  | 5.0409  | 0.9968   |
| S2N1      | 909 | 954.435    | 953.5946   | 0.0167  | 5.0316  | 0.9969   |
| S2N2      | 917 | 971.6473   | 983.6105   | 0.0187  | 5.0215  | 0.9966   |
| S2N3      | 934 | 987.6028   | 999.2371   | 0.0255  | 4.995   | 0.9964   |
