# Supplementary material for: L-arginine and N-carbamoylglutamic acid supplementation enhance young rabbit growth and immunity by regulating intestinal microbial community
Source: PubMed Central journal article supplement (PMC6946986; doi:10.5713/ajas.18.0984), 2019-05-28
Supplement: ajas-18-0984-suppl3.pdf [file ajas-18-0984-suppl3.pdf]

**Supplementary Table S3.** Microbial communities and abundance changed in different groups

| genus                                  | S1C             | S1L             | S1N             | S2C            | S2L             | S2N            |
|----------------------------------------|-----------------|-----------------|-----------------|----------------|-----------------|----------------|
| <i>Parabacteroides</i>                 | 0.14±0.0371     | 0.0343±0.0197   |                 |                |                 |                |
| <i>Ruminococcaceae_V9D2013_group</i>   | 2.13±0.064      |                 | 0.856±0.243     |                |                 |                |
| <i>Ruminiclostridium_1</i>             | 0.0328±0.00417  |                 | 0.0769±0.0126   |                |                 |                |
| <i>Ruminococcaceae_UCG-005</i>         | 0.442±0.0993    |                 | 0.128±0.0532    |                |                 |                |
| <i>Parasutterella</i>                  | 0.993±0.0801    |                 | 0.456±0.192     |                |                 |                |
| <i>Roseburia</i>                       | 0.00612±0.00159 |                 | 0.0338±0.0108   |                |                 |                |
| <i>Subdoligranulum</i>                 | 0.405±0.0645    |                 | 0.233±0.0221    |                |                 |                |
| <i>Parasutterella</i>                  | 0.315±0.0244    |                 |                 | 0.993±0.0801   |                 |                |
| <i>Barnesiella</i>                     | 0.212±0.0259    |                 |                 | 0.0635±0.0321  |                 |                |
| <i>Ruminococcaceae_V9D2013_group</i>   | 1.32±0.235      |                 |                 | 2.13±0.064     |                 |                |
| <i>Ruminiclostridium_1</i>             | 0.0987±0.0228   |                 |                 | 0.0328±0.00417 |                 |                |
| <i>dgA-11_gut_group</i>                | 2.53±0.964      |                 |                 | 0.118±0.118    |                 |                |
| <i>Ruminococcus_1</i>                  | 11.5±1.7        |                 |                 | 16.4±1.05      |                 |                |
| <i>Christensenellaceae_R-7_group</i>   |                 | 12.1±1.52       | 6.94±0.547      |                |                 |                |
| <i>Gelria</i>                          |                 | 0.0158±0.0052   | 0±0             |                |                 |                |
| <i>Ruminococcaceae_UCG-001</i>         |                 | 0.0114±0.0041   | 0±0             |                |                 |                |
| <i>Enterorhabdus</i>                   |                 | 0.00939±0.00375 | 0.0236±0.00374  |                |                 |                |
| <i>[Eubacterium]_ventriosum_group</i>  |                 | 0.00736±0.00121 |                 |                | 0.0168±0.000546 |                |
| <i>Anaerotruncus</i>                   |                 | 0.339±0.0961    |                 |                | 0.643±0.0228    |                |
| <i>[Eubacterium]_nodatum_group</i>     |                 | 0.0113±0.00406  |                 |                | 0.0852±0.0275   |                |
| <i>Ruminococcus_1</i>                  |                 |                 | 16.3±0.31       |                |                 | 12.5±0.12      |
| <i>Hydrogenoanaerobacterium</i>        |                 |                 | 0.00412±0.00107 |                |                 | 0.0122±0.00306 |
| <i>Clostridiales_bacterium</i>         |                 |                 |                 | 0.197±0.039    | 0.0396±0.0122   |                |
| <i>Anaerovorax</i>                     |                 |                 |                 | 0.0762±0.0104  | 0.154±0.0197    |                |
| <i>Alistipes</i>                       |                 |                 |                 | 3.54±0.19      |                 | 1.15±0.0776    |
| <i>Hydrogenoanaerobacterium</i>        |                 |                 |                 | 0±0            |                 | 0.0122±0.00306 |
| <i>Tyzzarella_3</i>                    |                 |                 |                 | 0.0536±0.00711 |                 | 0.132±0.0225   |
| <i>Bacteroides</i>                     |                 |                 |                 | 3.34±0.309     |                 | 1.31±0.597     |
| <i>[Eubacterium]_ruminantium_group</i> |                 |                 |                 | 0.0102±0.00368 |                 | 0.168±0.0594   |
| <i>Alistipes</i>                       |                 |                 |                 |                | 3.14±0.162      | 1.15±0.0776    |
| <i>Family_XIII_AD3011_group</i>        |                 |                 |                 |                | 0.0717±0.00552  | 0.0508±0.00585 |
