# Supplementary material for: L-arginine and N-carbamoylglutamic acid supplementation enhance young rabbit growth and immunity by regulating intestinal microbial community
Source: PubMed Central journal article supplement (PMC6946986; doi:10.5713/ajas.18.0984), 2019-05-28
Supplement: ajas-18-0984-suppl9.pdf [file ajas-18-0984-suppl9.pdf]

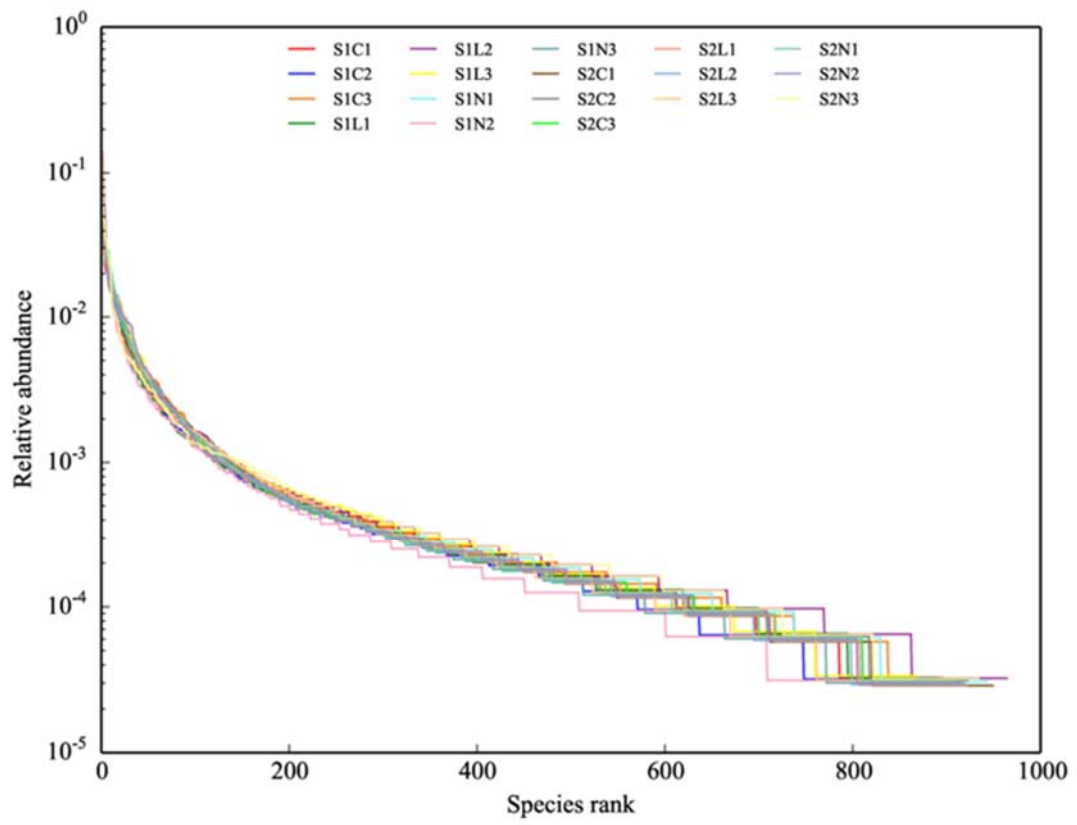

Supplementary Figure S6. Rank Abundance curve for all samples.
