# Supplementary material for: L-arginine and N-carbamoylglutamic acid supplementation enhance young rabbit growth and immunity by regulating intestinal microbial community
Source: PubMed Central journal article supplement (PMC6946986; doi:10.5713/ajas.18.0984), 2019-05-28
Supplement: ajas-18-0984-suppl10.pdf [file ajas-18-0984-suppl10.pdf]

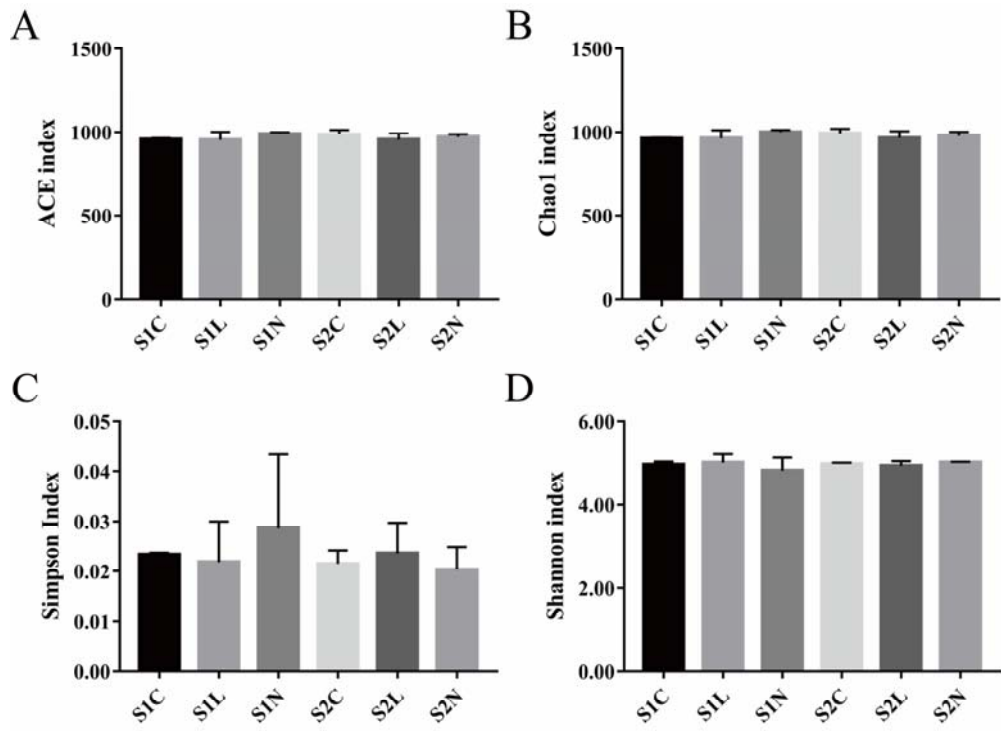

**Supplementary Figure S7.** Variations in alpha diversity of all groups.

Comparisons of the bacterial community ACE (A), Chao1 (B) Simpson (C), and Shannon (D) indexes within the different groups.
